# Supplementary material for: The C-terminal fragment of the ribosomal P protein complexed to trichosanthin reveals the interaction between the ribosome-inactivating protein and the ribosome
Source: PubMed Central journal article supplement — Nucleic Acids Res. 2008 Dec 10;37(2):602–10. doi: 10.1093/nar/gkn922 (PMC2632931; doi:10.1093/nar/gkn922), 2008-12-10
Supplement: gkn922_1.pdf [file gkn922_1.pdf]

**Supplementary Figure 1.** Stereo images of molecular docking of c11-P peptide to PAP. PAP. c11-P is shown in ball-and stick and in green colour. Potential hydrogen bond interactions of the RIPs and c-11 peptide are indicated. Before energy minimisation, the side chain of Lys200 in PAP is found to clash with the ring of Phe10 in c11-P.

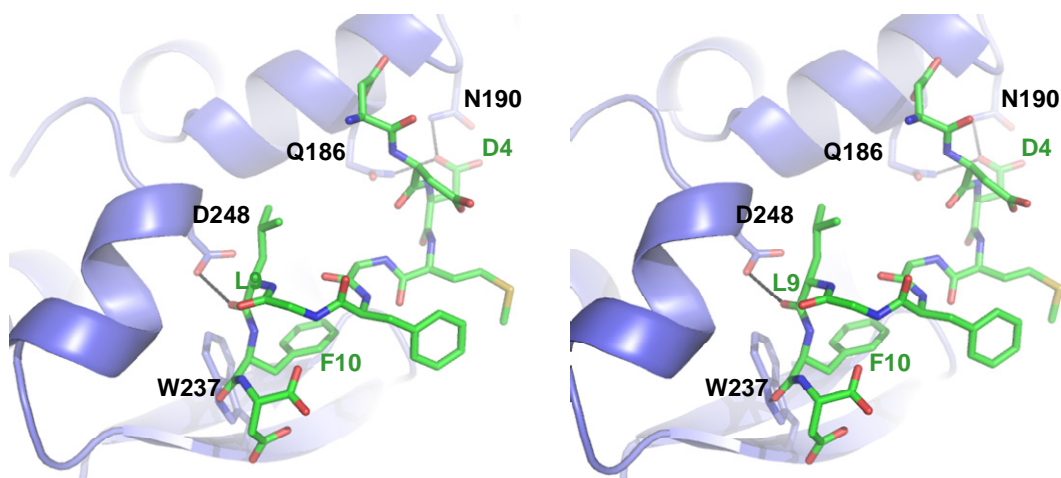

**Supplementary Table 1.** Possible hydrogen bonds formed between the c11-P peptide

and PAP

| C11-P     | PAP         | Distance (Å) |
|-----------|-------------|--------------|
| Asp 4 OD1 | Gln 186 NE2 | 3.12         |
| Asp 4 OD1 | Asn 190 ND2 | 3.16         |
| Leu 9 O   | Asp 248 OD2 | 2.90         |
| Phe 10 O  | Trp 237 NE1 | 3.42         |
